# Supplementary material
Source: publisher figshare collection journal article supplement (https://geolsoc.figshare.com/articles/dataset/_/3452981)
Supplement: Supplementary file 1 [file 1]

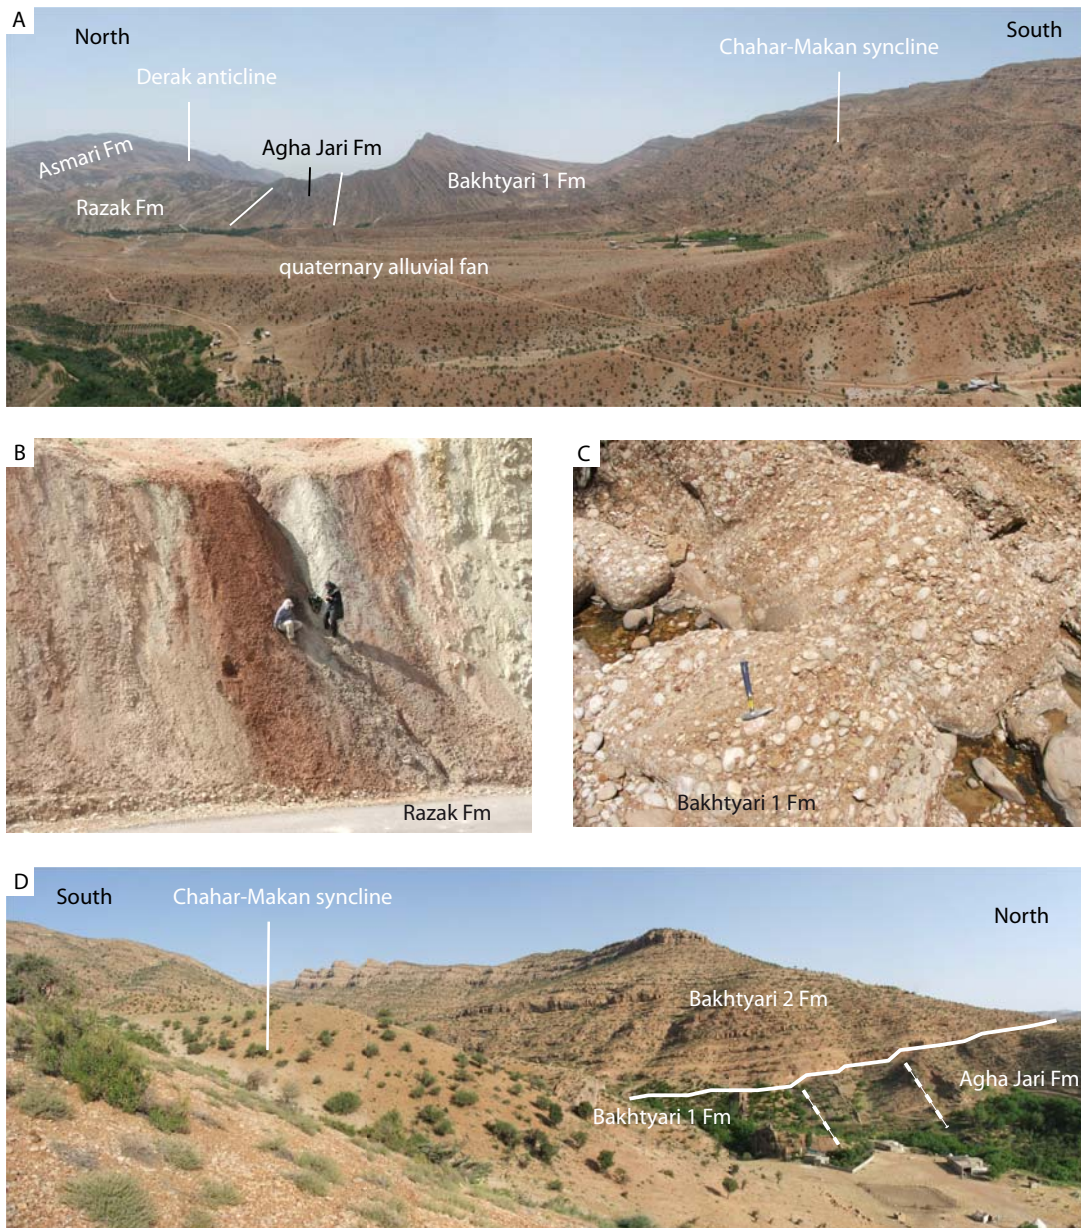

Supplementary file SF 1: A) Field photograph of the Chahar-Makan section above the Derak anticline to the left (North). B) Sandstones and yellow calcareous beds alternated with red siltstones characteristic of sabkhas environment in the Razak Formation. C) Clast-supported, poorly-sorted, and well-rounded conglomerates of the Bakhtyari 1 Formation arranged as thick channel-like conglomeratic beds. D) Alluvial deposits of the Bk2 Formation overlying unconformably above the Bakhtyari 1 and Agha Jari Formations.
