# Supplementary material
Source: publisher figshare collection journal article supplement (https://geolsoc.figshare.com/articles/dataset/_/3452981)
Supplement: Supplementary file 3 [file 1]

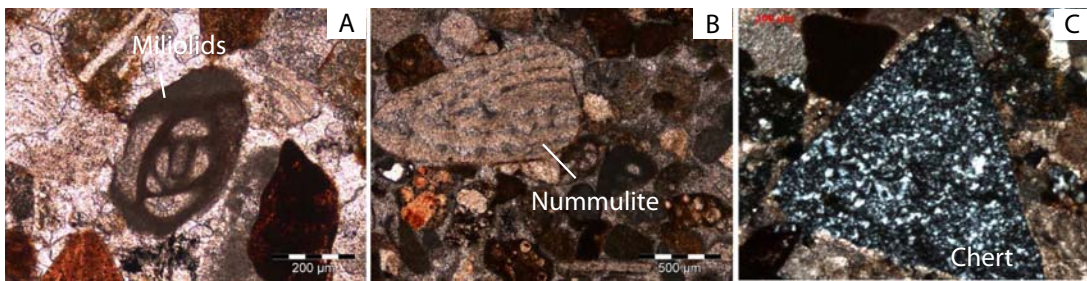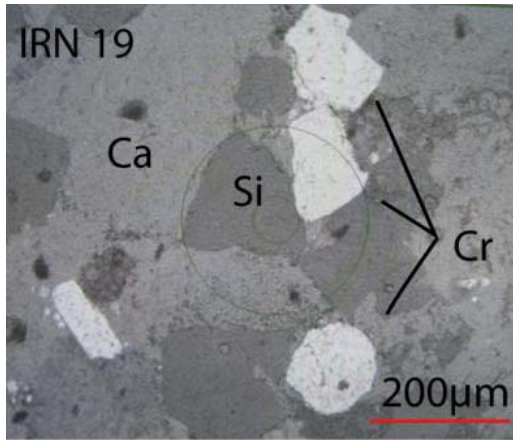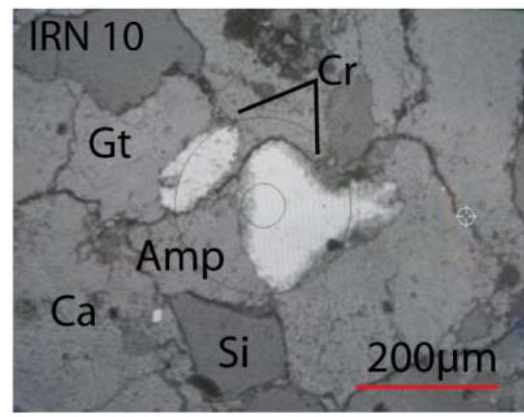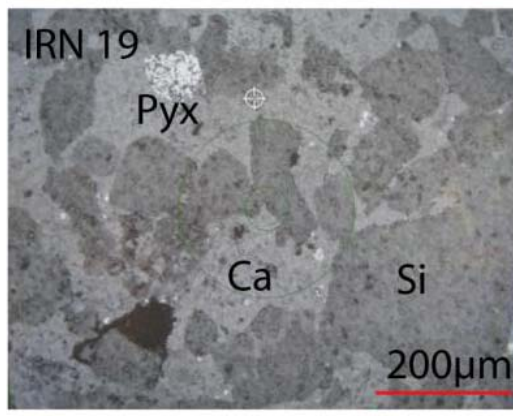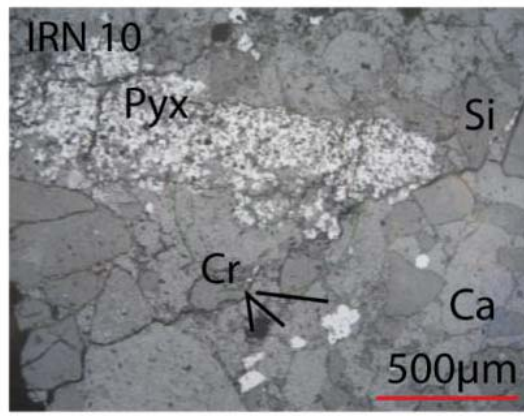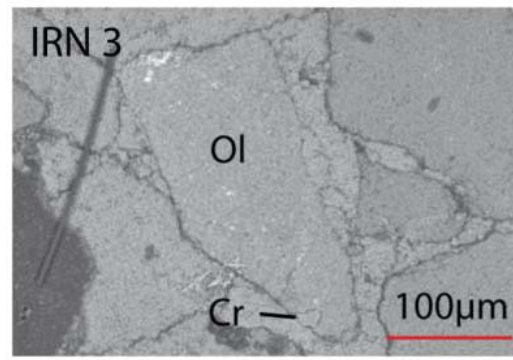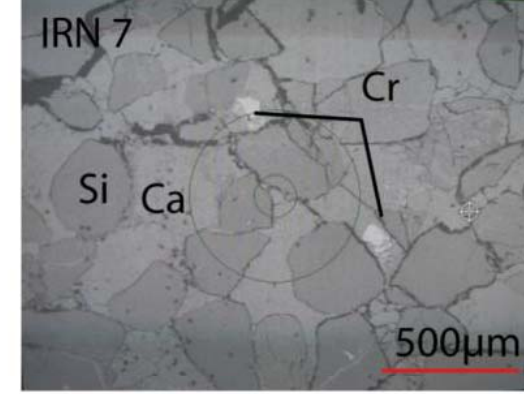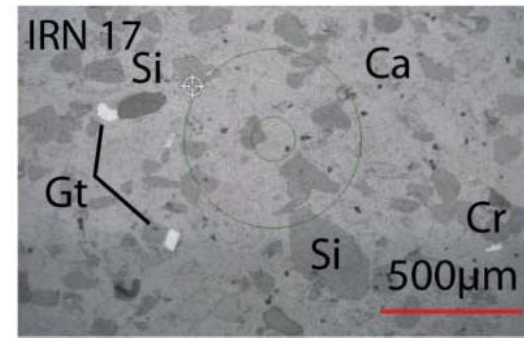

Supplementary file SF 3: Thin-sections and SEM micrograph of sandstone samples. Thin-sections show the main lithic fragments present in our samples. They include miliolids (A), nummulite bioclasts (B) and polycrystalline (chert) clast (C) taken from sample IRN1. SEM micrographs allowed us to identify Chromite (Cr), Garnet (Gt), Amphibole (Amp), Pyroxene (Pyx), Calcite (Ca) and Chert (Si) in samples IRN10 and IRN19 as well as Olivine (Ol) in sample IRN3.
